# Supplementary material
Source: PubMed Central journal article supplement (PMC2610499)
Supplement: M807233200_1.pdf [file M807233200_1.pdf]

## SUPPLEMENTARY MATERIALS

### **SFigure 1 Analysis of Smad1/5/8 phosphorylation**

Immunohistochemical staining of heart sections at E11.5 with an antibody against phosphorylated Smad1/5/8 with counter-staining of methyl green. The cardiac cushion areas are amplified on the right. Abbreviations: RA for right atrium, LA for left atrium, AVC for atrioventricular cushion, RV for right ventricle, LV for left ventricle, and VS for ventricular septum.

### **SFigure 2 Analysis of cell proliferation in Smad7<sup>ΔMH2/-</sup> mouse**

- (A) Smad7<sup>ΔMH2/-</sup> embryos and wild-type controls at E12.5 were stained for BrdU (red) and the nuclei were counterstained with Hoechst 33342 (blue). Results of H/E staining with the same sections are shown in the lower panels. Note the increase of cell proliferation rate in Smad7<sup>ΔMH2/-</sup> mouse at right ventricular trabecula (marked by circles).
- (B) The table illustrates detailed analysis of cell proliferation rate in different regions of the heart (n = 4 for both Smad7<sup>ΔMH2/-</sup> and wild type embryos). Cell proliferation rate was calculated as the ratio of BrdU-positive cells versus Hoechst-positives cells.

SFigure 1

**Wild type**

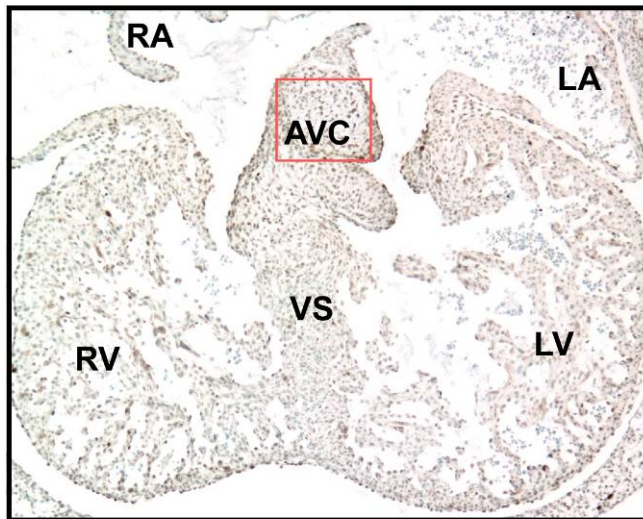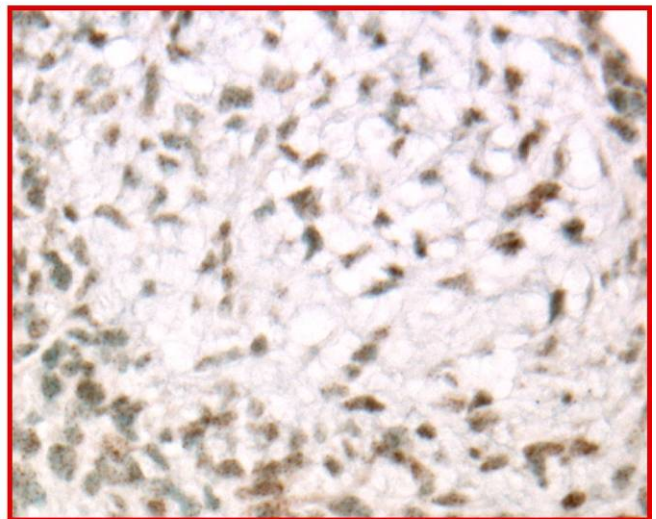

**Smad7 $\Delta$ MH2<sup>-/-</sup>**

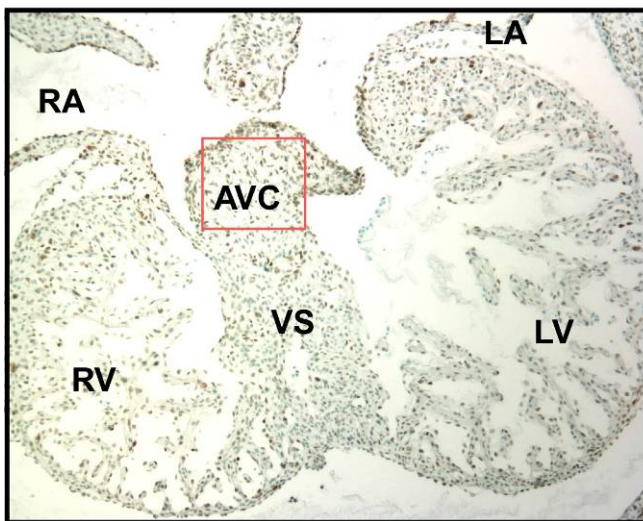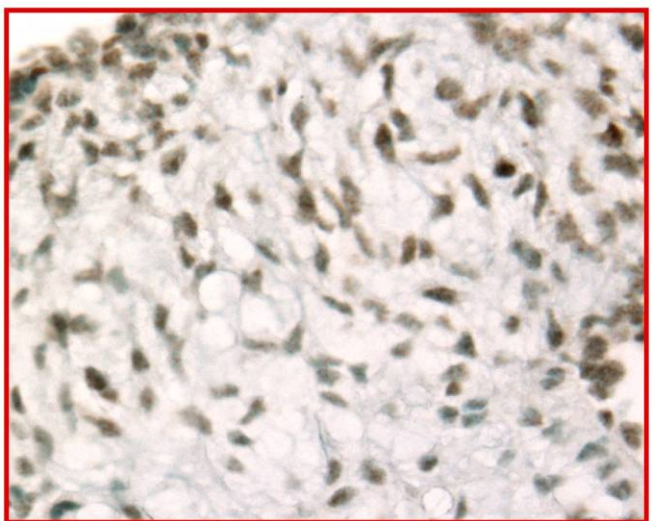

SFigure 2

**A**

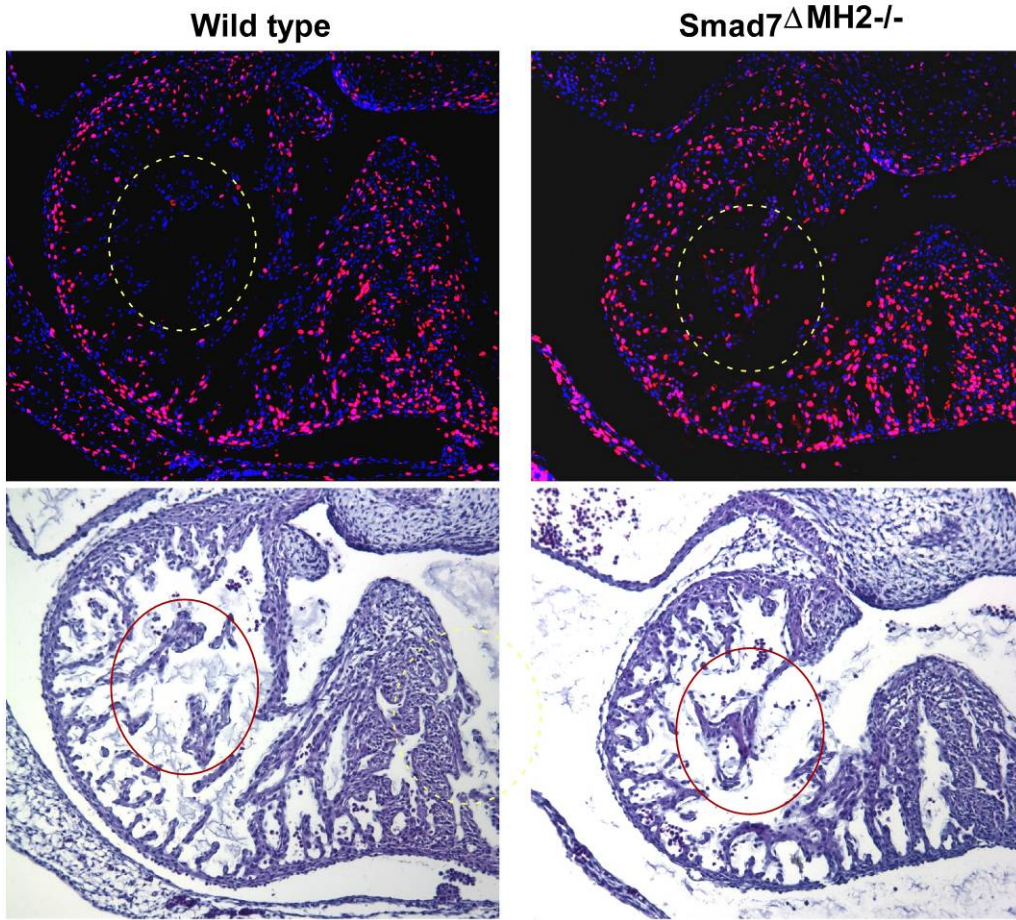

**B**

|                 | Area       | Smad7 <sup>ΔMH2</sup> | Average | SD    | p value |
|-----------------|------------|-----------------------|---------|-------|---------|
| Right ventricle | Wall       | wt                    | 0.304   | 0.051 | 0.213   |
|                 |            | -/-                   | 0.342   | 0.043 |         |
|                 | Trabecular | wt                    | 0.071   | 0.010 | 0.010   |
|                 |            | -/-                   | 0.192   | 0.042 |         |
| Left ventricle  | Wall       | wt                    | 0.317   | 0.059 | 0.746   |
|                 |            | -/-                   | 0.343   | 0.098 |         |
|                 | Trabecular | wt                    | 0.083   | 0.011 | 0.296   |
|                 |            | -/-                   | 0.109   | 0.034 |         |
| Cushion         | Bottom     | wt                    | 0.279   | 0.085 | 0.915   |
|                 |            | -/-                   | 0.273   | 0.142 |         |
|                 | Top        | wt                    | 0.185   | 0.027 | 0.771   |
|                 |            | -/-                   | 0.205   | 0.117 |         |
| Septum          | Middle     | wt                    | 0.324   | 0.049 | 0.802   |
|                 |            | -/-                   | 0.307   | 0.091 |         |
|                 | Bottom     | wt                    | 0.332   | 0.132 | 0.414   |
|                 |            | -/-                   | 0.301   | 0.074 |         |
